# Supplementary material for: Detecting Redox Potentials Using Porous Boron Nitride/ATP-DNA Aptamer/Methylene Blue Biosensor to Monitor Microbial Activities
Source: MDPI journal article supplement (doi:10.3390/mi13010083), 2022-01-04
Supplement: s1 [file s1]

*Article*

# **Detecting redox potentials using porous boron nitride/ATP-DNA aptamer/methylene blue biosensor to monitor microbial activities**

Kai Guo, Zirui Song , Gaoxing Wang and Chengchun Tang

|   | 1                 | 2                 | 3                 | 4                 | 5                 | 6                 | 7                 | 8                 | 9                 | 10                | 11                | 12                |
|---|-------------------|-------------------|-------------------|-------------------|-------------------|-------------------|-------------------|-------------------|-------------------|-------------------|-------------------|-------------------|
| A | $100a$            |                   | $90a + 5b + 5c$   | $90a + 5b + 5c$   | $90a + 6b + 4c$   | $90a + 6b + 4c$   | $90a + 7b + 3c$   | $90a + 7b + 3c$   | $90a + 8b + 2c$   | $90a + 8b + 2c$   | $90a + 8b + 2c$   | $90a + 9b + 1c$   |
| B | $80a + 9b + 1c$   | $80a + 19b + 1c$  | $80a + 18b + 2c$  | $80a + 18b + 2c$  | $80a + 17b + 3c$  | $80a + 17b + 3c$  | $80a + 16b + 4c$  | $80a + 16b + 4c$  | $80a + 15b + 5c$  | $80a + 15b + 5c$  | $80a + 14b + 6c$  | $80a + 14b + 6c$  |
| C | $80a + 13b + 7c$  | $80a + 13b + 7c$  | $80a + 12b + 8c$  | $80a + 12b + 8c$  | $80a + 11b + 9c$  | $80a + 11b + 9c$  | $80a + 10b + 10c$ | $80a + 10b + 10c$ | $80a + 9b + 11c$  | $80a + 9b + 11c$  | $80a + 8b + 12c$  | $80a + 8b + 12c$  |
| D | $80a + 7b + 13c$  | $80a + 7b + 13c$  | $80a + 6b + 14c$  | $80a + 6b + 14c$  | $80a + 5b + 15c$  | $80a + 5b + 15c$  | $80a + 4b + 16c$  | $80a + 4b + 16c$  | $80a + 3b + 17c$  | $80a + 3b + 17c$  | $80a + 2b + 18c$  | $80a + 2b + 18c$  |
| E | $80a + 11b + 19c$ | $80a + 11b + 19c$ | $70a + 29b + 1c$  | $70a + 29b + 1c$  | $70a + 28b + 2c$  | $70a + 28b + 2c$  | $70a + 27b + 3c$  | $70a + 27b + 3c$  | $70a + 26b + 4c$  | $70a + 26b + 4c$  | $70a + 25b + 5c$  | $70a + 25b + 5c$  |
| F | $70a + 24b + 6c$  | $70a + 24b + 6c$  | $70a + 23b + 7c$  | $70a + 23b + 7c$  | $70a + 22b + 8c$  | $70a + 22b + 8c$  | $70a + 21b + 9c$  | $70a + 21b + 9c$  | $70a + 20b + 10c$ | $70a + 20b + 10c$ | $70a + 19b + 11c$ | $70a + 19b + 11c$ |
| G | $70a + 18b + 12c$ | $70a + 18b + 12c$ | $70a + 17b + 13c$ | $70a + 17b + 13c$ | $70a + 16b + 14c$ | $70a + 16b + 14c$ | $70a + 15b + 15c$ | $70a + 15b + 15c$ | $70a + 14b + 16c$ | $70a + 14b + 16c$ | $70a + 13b + 17c$ | $70a + 13b + 17c$ |
| H | $70a + 12b + 18c$ | $70a + 12b + 18c$ | $70a + 11b + 19c$ | $70a + 11b + 19c$ | $70a + 10b + 20c$ | $70a + 10b + 20c$ | $70a + 9b + 21c$  | $70a + 9b + 21c$  | $70a + 8b + 22c$  | $70a + 8b + 22c$  | $70a + 7b + 23c$  | $70a + 7b + 23c$  |

|   | 1                      | 2                      | 3                      | 4                      | 5                      | 6                      | 7                      | 8                      | 9                      | 10                     | 11                     | 12                     |
|---|------------------------|------------------------|------------------------|------------------------|------------------------|------------------------|------------------------|------------------------|------------------------|------------------------|------------------------|------------------------|
| A | 70 a + 6b<br>+ 24c     | 70 a + 6b<br>+ 24c     | 70 a + 5b<br>+ 25c     | 70 a + 5b<br>+ 25c     | 70 a + 4b<br>+ 26c     | 70 a + 4b<br>+ 26c     | 70 a + 3b<br>+ 27c     | 70 a + 3b<br>+ 27c     | 70 a + 2b<br>+ 28c     | 70 a + 2b<br>+ 28c     | 70 a + 1b<br>+ 29c     | 70 a + 1b<br>+ 29c     |
| B | 60 a +<br>29b +<br>11c | 60 a +<br>29b +<br>11c | 60 a +<br>28b +<br>12c | 60 a +<br>28b +<br>12c | 60 a +<br>27b +<br>13c | 60 a +<br>27b +<br>13c | 60 a +<br>26b +<br>14c | 60 a +<br>26b +<br>14c | 60 a +<br>25b +<br>15c | 60 a +<br>25b +<br>15c | 60 a +<br>24b +<br>16c | 60 a +<br>24b +<br>16c |
| C | 60 a +<br>23b +<br>17c | 60 a +<br>23b +<br>17c | 60 a +<br>22b +<br>18c | 60 a +<br>22b +<br>18c | 60 a +<br>21b +<br>19c | 60 a +<br>21b +<br>19c | 60 a +<br>20b +<br>20c | 60 a +<br>20b +<br>20c | 60 a +<br>19b +<br>21c | 60 a +<br>19b +<br>21c | 60 a +<br>18b +<br>22c | 60 a +<br>18b +<br>22c |
| D | 60 a +<br>17b +<br>23c | 60 a +<br>17b +<br>23c | 60 a +<br>16b +<br>24c | 60 a +<br>16b +<br>24c | 60 a +<br>15b +<br>25c | 60 a +<br>15b +<br>25c | 60 a +<br>14b +<br>26c | 60 a +<br>14b +<br>26c | 60 a +<br>13b +<br>27c | 60 a +<br>13b +<br>27c | 60 a +<br>12b +<br>28c | 60 a +<br>12b +<br>28c |
| E | 60 a +<br>11b +<br>29c | 60 a +<br>11b +<br>29c | 60 a +<br>10b +<br>30c | 60 a +<br>10b +<br>30c | 60 a + 9b<br>+ 31c     | 60 a + 9b<br>+ 31c     | 60 a + 8b<br>+ 32c     | 60 a + 8b<br>+ 32c     | 60 a + 7b<br>+ 33c     | 60 a + 7b<br>+ 33c     | 60 a + 6b<br>+ 34c     | 60 a + 6b<br>+ 34c     |
| F | 60 a + 5b<br>+ 35c     | 60 a + 5b<br>+ 35c     | 60 a + 4b<br>+ 36c     | 60 a + 4b<br>+ 36c     | 60 a + 3b<br>+ 37c     | 60 a + 3b<br>+ 37c     | 60 a + 2b<br>+ 38c     | 60 a + 2b<br>+ 38c     | 60 a + 1b<br>+ 39c     | 60 a + 1b<br>+ 39c     |                        |                        |
| G |                        |                        |                        |                        |                        |                        |                        |                        |                        |                        |                        |                        |
| H |                        |                        |                        |                        |                        |                        |                        |                        |                        |                        |                        |                        |

**Figure S1.** Fluorescence testing when changing the composition of microbial community (a: *Flavobacteria* sp.; b: *E. coli*.; c: *Bacillus subtilis*).

|   | 1   | 2   | 3   | 4   | 5   | 6   | 7   | 8   | 9   | 10  | 11  | 12  |
|---|-----|-----|-----|-----|-----|-----|-----|-----|-----|-----|-----|-----|
| A |     |     | 1i  | 1i  | 2i  | 2i  | 3i  | 3i  | 4i  | 4i  | 5i  | 5i  |
| B | 6i  | 6i  | 7i  | 7i  | 8i  | 8i  | 9i  | 9i  | 10i | 10i | 11i | 11i |
| C | 12i | 12i | 13i | 13i | 14i | 14i | 15i | 15i | 16i | 16i | 17i | 17i |
| D | 18i | 18i | 19i | 19i | 20i | 20i | 21i | 21i | 22i | 22i | 23i | 23i |
| E | 24i | 24i | 25i | 25i | 26i | 26i | 27i | 27i | 28i | 28i | 29i | 29i |
| F | 30i | 30i | 31i | 31i | 32i | 32i |     |     |     |     |     |     |
| G |     |     |     |     |     |     |     |     |     |     |     |     |
| H |     |     |     |     |     |     |     |     |     |     |     |     |

**Figure S2.** Added heavy metals to each well (Control A1 & A2).  $\text{Zn}(\text{CH}_3\text{COO})_2$  (i) is shown as an example here, according to which the other three metals are added as well.

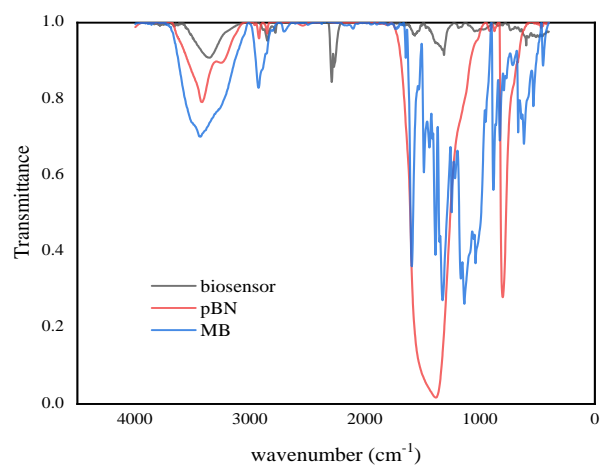

**Figure S3.** FTIR spectra of the biosensor, pBN and MB.

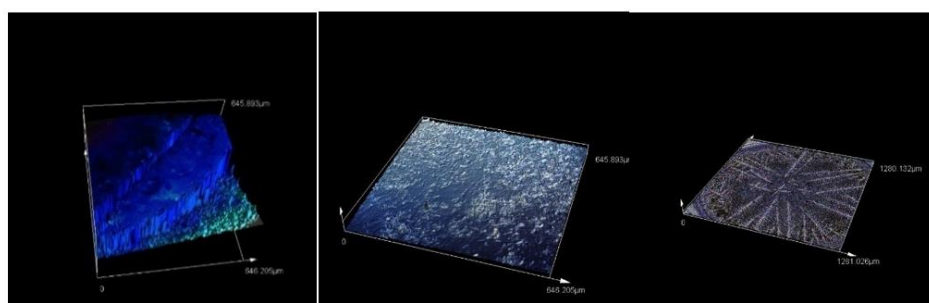

**Figure S4.** Images for biosensor (a), Flavobacterium sp. & biosensor (b), and Flavobacterium sp. & E coli. & Bacillus subtilis (c) using laser bifocal microscope.

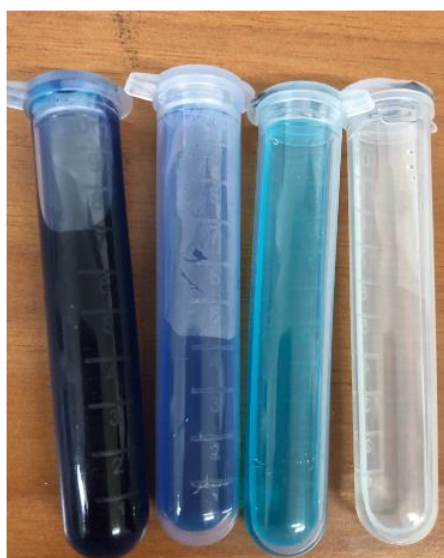

**Figure S5.** Colorimetric differences (a)MB; (b) MB-aptamer; (c) MB-aptamer-Fe (III); (d) MB-aptamer-ascorbic acid.

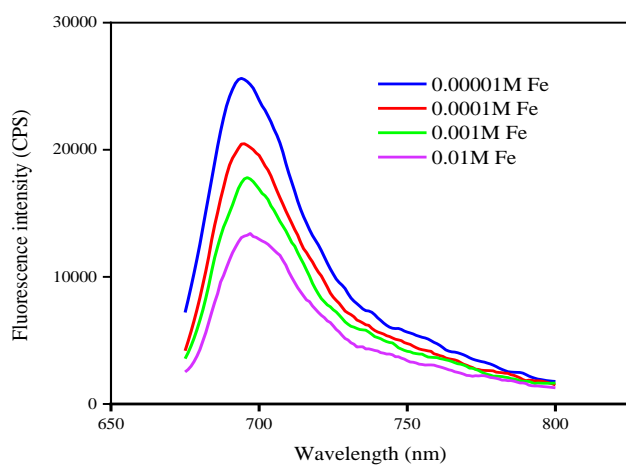

**Figure S6.** Fluorescence change when MB/biosensor was added to Fe (III) solution with different concentrations.

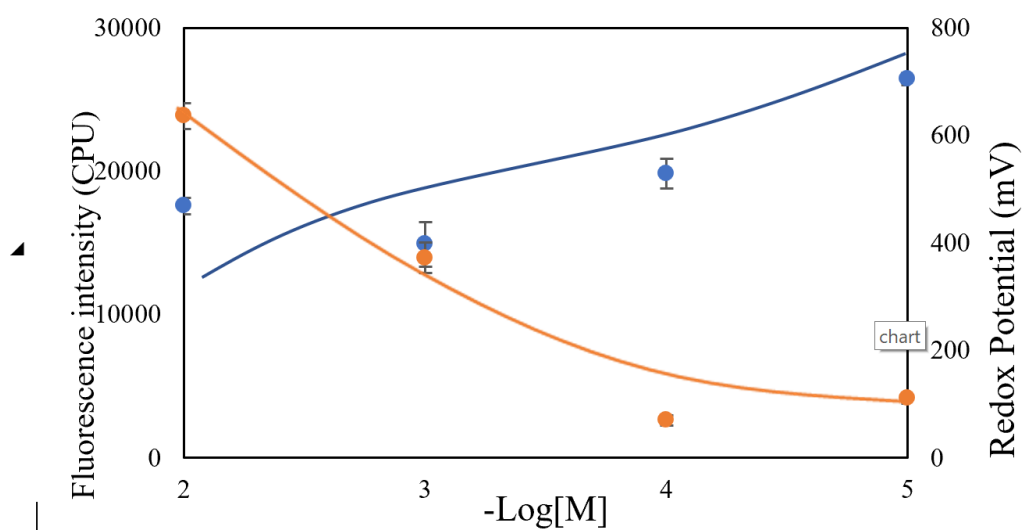

**Figure S7.** "Mirror" relationship between fluorescence intensity and redox potential as the concentration of Fe (III) inclined. .

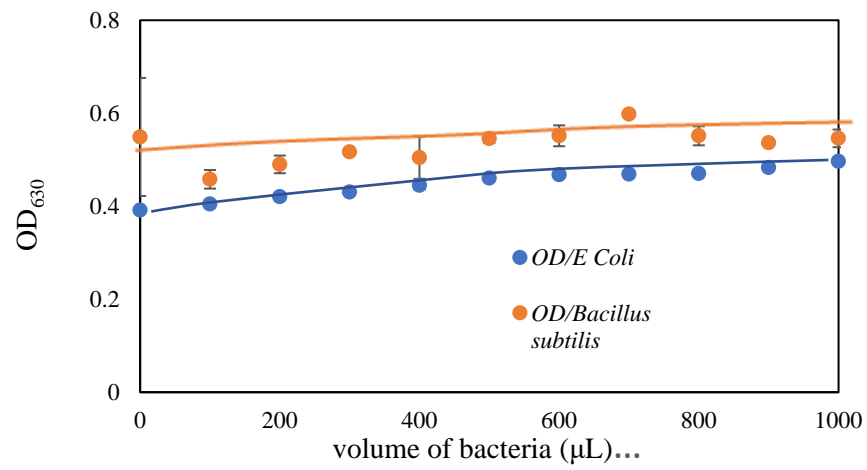

Figure S8. OD<sub>630</sub> values after Flavobacteria sp. were grown with E coli. or Bacillus subtilis.

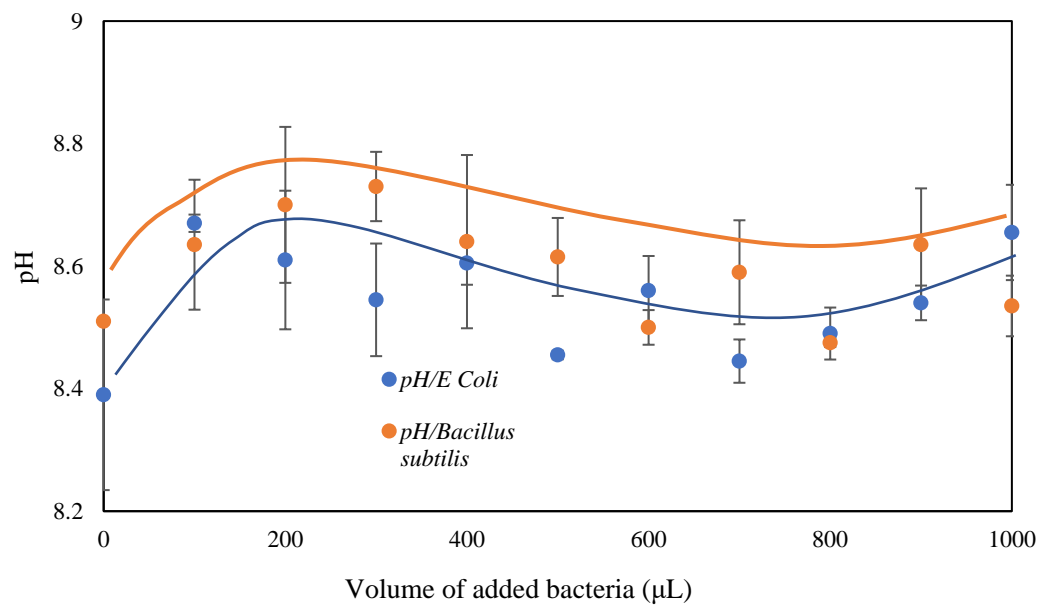

Figure S9. pH change after Flavobacteria sp. were grown with E coli. and Bacillus subtilis.
